# Supplementary material
Source: Research Square preprint supplement (doi:10.21203/rs.3.rs-9793292/v1)
Supplement: Supplementary file 1 [file 6456d4974aba3dc8e1cf2092.pdf]

Additonal File 2: rPCP Survey

**Year End Handoffs: Understanding Patient Characteristics Associated with Transfer from Resident to Attending Primary Care Panels**

Resident Survey

Each year, in anticipation of the new academic year, we ask all PJC residents to review their primary care panels, which includes potentially recommending patients for transfer to attending primary care physicians (PCPs). We are studying the process of transferring patients from resident PCPs to attending PCPs, with the goal of standardizing a workflow to identify and transfer patients to attending PCPs each academic year. For this reason, we are sending a survey to understand what factors contribute to recommendation for transfer to attending PCP. The survey should take less than 5 minutes. The survey is optional and voluntary. All information will be kept confidential and used to improve the ambulatory experience at the Jen Center.

1. How do you rate the relative importance of the following patient characteristics below when recommending patients for transfer to an attending:

| <b>Factor</b>                                                                                                 | <b>Choose One:</b>   |                    |                      |                |                     |
|---------------------------------------------------------------------------------------------------------------|----------------------|--------------------|----------------------|----------------|---------------------|
| <b>Age</b>                                                                                                    | Not at all important | Somewhat Important | Moderately Important | Very important | Extremely Important |
| <b>Gender</b>                                                                                                 | Not at all important | Somewhat Important | Moderately Important | Very important | Extremely Important |
| <b>Race or Ethnicity</b>                                                                                      | Not at all important | Somewhat Important | Moderately Important | Very important | Extremely Important |
| <b>Non English Language Preference</b>                                                                        | Not at all important | Somewhat Important | Moderately Important | Very important | Extremely Important |
| <b>Socioeconomic challenges</b>                                                                               | Not at all important | Somewhat Important | Moderately Important | Very important | Extremely Important |
| <b>High frequency of primary care needs (both Jen Center appointments, telephone calls, MyChart messages)</b> | Not at all important | Somewhat Important | Moderately Important | Very important | Extremely Important |
| <b>Number of ED visits and hospitalizations in the last year</b>                                              | Not at all important | Somewhat Important | Moderately Important | Very important | Extremely Important |
| <b>Frequent no-shows at the Jen Center</b>                                                                    | Not at all important | Somewhat Important | Moderately Important | Very important | Extremely Important |
| <b>Medical Comorbidities</b>                                                                                  | Not at all important | Somewhat Important | Moderately Important | Very important | Extremely Important |
| <b>Psychiatric Comorbidities</b>                                                                              | Not at all important | Somewhat Important | Moderately Important | Very important | Extremely Important |

1. How confident do you feel about your recommendations for attending transfer?

- a. Not confident
  - b. Somewhat confident
  - c. Moderately confident
  - d. Very confident
  - e. Extremely confident
2. What would increase your confidence in your recommendations for attending transfer?
3. What is your post-graduate year?
- a. PGY-1
  - b. PGY-2
  - c. PGY-3 or above
4. What program are you in?
- a. Categorical or Med/Derm
  - b. DGM
5. Are you graduating from internal medicine residency in June 2024?
- a. Yes
  - b. No
