# Supplementary material
Source: Research Square preprint supplement (doi:10.21203/rs.3.rs-9793292/v1)
Supplement: Supplementary file 1 [file e73768d0ab7c3fad85077755.xlsx]

## Sheet: TRANSITION SHEET
Additional File 1: rPCP Panel Review. Rows A-F are pre-populated by clinic staff. Rows G-M are completed by rPCP.
Patient Name	MRN	Non-English Speaking Language	Last Visit with Resident PCP	Next Encounter in Primary Care	Care Management Enrollment Status	Gender Preference	Risk: High (>3 appts/yr, clinical/social factors, care management) Medium (2 appts/yr) Low (1 appt/yr) Never met	Do you recommend transfer to an attending PCP (if yes, must fill out next 2 columns)?	Did the patient request attending transfer (Y/N)?	Patient Request	Should patient only be seen in-person? (*Please state reasoning in column M)	Comments for Scheduling/Additional Social Context
